# Supplementary material for: Thermodynamic investigation with chemical kinetic analysis on the reoxidation phenomenon of the Cr(iii) in air
Source: Royal Society of Chemistry journal article supplement (doi:10.1039/d0ra01403f), 2020-01-01
Supplement: d0ra01403f1.pdf [file d0ra01403f1.pdf]

Support information

## 1. Chemical dynamic analysis

The chemical dynamic equation can be written as:

$$- \frac{d c(\text{Cr(III)})}{dt} = k * c(\text{Cr(III)}) * c(\text{OH}^-)$$

In this equation,  $k$  is the chemical reaction constant, and  $c(\text{Cr(III)})$  is the concentration of  $\text{Cr(III)}$ . Because the concentration of  $\text{OH}^-$  in solution is a lot, and the relative consumption in the reaction process is less. So we can ignore the effect of  $\text{OH}^-$ , and the reaction is viewed as pseudo first order kinetics.

The kinetic equation of the reaction can finally be written as:

$$\ln c(\text{Cr(III)}) = -kt$$

The Kinetic fitting results of the oxidation reaction of  $\text{Cr(III)}$  in different pH can be seen in Fig.6.

In addition, we can establish the relationship between the chemical reaction constant and the temperature by Arrhenius equation, which can be written as:

$$\ln k = \frac{-E_a}{RT} + \ln A$$

$E_a$  is the activation energy, while  $A$  is frequency factor. Kinetic fitting results of the oxidation reaction of  $\text{Cr(III)}$  in different temperature and the relationship of  $\ln k - 1/T$  can be seen in Fig.7.

## 2. Thermodynamic calculation

In the discussion of the electrochemical system composed of metallic oxide and water, we can illustrate a half cell reaction as follows:

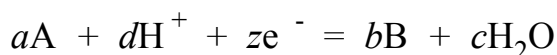

Where  $a, d, b, c$  represent the number of reaction cells of species A,  $H^+$ , B,  $H_2O$ . The  $z$  is the number of electrons translated in this reaction. In dilute solution,  $a(H_2O)$  is similar to 1 for the activity of water. The relationship between electrochemical electromotive force and activity of various substances involved in battery reaction can be expressed as Nernst equation:

$$E_T = E_T^\ominus - \left[ \frac{RT}{zF} \right] \lg \frac{a_B^b}{a_A^a a_{H^+}^d}$$

$$\text{Besides, } \text{pH} = -\lg a(H^+), \lg k = \ln k / 2.303$$

$$\text{So, } E_T = E_T^\ominus - [2.303RT/zF] \lg \frac{a_B^b}{a_A^a} - [2.303dR/zF] \text{pH}$$

In the equation,  $E_T$  and  $E_T^\ominus$  are in behalf of electrochemical potential or standard electrochemical potential at appointed temperature.  $a_B^b, a_A^a, a_{H^+}^d$  are certain times overall activity of each species. F and R is corresponding to Faraday's constant and molar gas constant. At last, we can get the relationship between G and E by equilibrium constant K:

$$\Delta_r G_T^\ominus = -zFE_T^\ominus = -RT \ln K^\ominus$$

$\Delta_r G_T^\ominus$  is Gibbs free energy of standard electrochemical reaction, and  $K^\ominus$  is standard equilibrium constant of the reaction. In general, we can get the  $\Delta G$ -pH diagram at the certain temperature and ionic activity with the

relationship of pH,  $E_T$  and  $\Delta_r G_T^\ominus$ .
